# Trends but Not Individual Values of Central Venous Oxygen Saturation Agree with Mixed Venous Oxygen Saturation during Varying Hemodynamic Conditions

Michael H. Dueck, M.D., D.E.A.A.,\* Markus Klimek, M.D., D.E.A.A.,† Stefan Appenrodt,‡ Christoph Weigand, M.D.,\* Ulf Boerner, M.D.§

**Background:** Previous studies found contradictory results regarding the question whether mixed venous oxygen saturation ( $S_{vo_2}$ ) and central venous oxygen saturation ( $Sc_{vo_2}$ ) are equivalent. The inconsistency of study results may result from different study designs and different, partly questionable, statistical approaches.

**Methods:** The authors performed a prospective clinical trial comparing individual oxygen saturation values as well as the trend of values in blood from the superior vena cava ( $Sc_{vo_2}$ ), the right atrium ( $S_{rao_2}$ ), and the pulmonary artery ( $S_{vo_2}$ ) during varying hemodynamic situations. The subjects were 70 patients scheduled to undergo elective neurosurgical operations in the sitting position. Oxygen saturation was measured photospectrometrically in blood samples simultaneously taken at four different time points during supine and sitting positions. Statistical analysis was performed following the recommendations of Bland and Altman.

**Results:** Five hundred two comparative sets of measurements were obtained. Ninety-five percent limits of agreement ranging from  $\pm 6.83$  to  $\pm 9.30\%$  for single values were interpreted as clinically unacceptable. In contrast, correlations between changes of  $S_{vo_2}$  and  $Sc_{vo_2}$  as well as of  $S_{vo_2}$  and  $S_{rao_2}$  were interpreted as clinically acceptable ( $R \geq 0.755$ , Pearson correlation coefficient;  $P \leq 0.0001$ ).

**Conclusions:** In this sample of patients, exact numerical values of  $Sc_{vo_2}$  and  $S_{rao_2}$  are not equivalent to those of  $S_{vo_2}$  in varying hemodynamic conditions. However, for clinical purposes, the trend of  $Sc_{vo_2}$  may be substituted for the trend of  $S_{vo_2}$ . In addition, previous studies investigating the agreement between  $S_{vo_2}$  and  $Sc_{vo_2}$  were found to be lacking in their chosen statistical approaches.

MIXED venous oxygen saturation ( $S_{vo_2}$ ) monitoring is used as a surrogate for the balance between systemic oxygen delivery and consumption during the treatment of critically ill patients.<sup>1</sup> However, measurement of  $S_{vo_2}$  requires placement of a pulmonary artery (PA) catheter with a risk-versus-benefit relation that is still a matter of controversy.<sup>2-4</sup> On the other hand, a central venous (CV) catheter is routinely inserted in critically ill patients for monitoring of CV pressure and administration of catecholamines and parenteral nutrition. Therefore,

measurement of CV oxygen saturation ( $Sc_{vo_2}$ ) seems to be an attractive alternative to monitoring of  $S_{vo_2}$  because it can be performed more easily, is less risky, and is less costly.

In a recently published guideline,  $S_{vo_2}$  and  $Sc_{vo_2}$  were declared as equivalent for the management of severe sepsis,<sup>5</sup> although previous studies found contradictory results.<sup>6-25</sup> It should be noted that the statistical approaches used in most of these investigations (e.g., correlation and regression analysis<sup>7,8,12-14,16</sup>) are questionable regarding the statistical evaluation of the agreement of two different methods.<sup>26,27</sup> Furthermore, one has to differentiate between the analysis of single data points and the analysis of the change in oxygen saturation values over time (trend).

The aim of our study was to compare  $S_{vo_2}$  versus  $Sc_{vo_2}$  in various hemodynamic conditions. Because some previous studies only evaluated the agreement between  $S_{vo_2}$  and right atrial oxygen saturation ( $S_{rao_2}$ ),<sup>10,17,18</sup> we also compared  $S_{vo_2}$  versus  $S_{rao_2}$ . The sitting position, which is used to perform neurosurgical operations in the cerebellum and the cerebellopontine angle, is known to induce hemodynamic changes compared with the supine position.<sup>28-30</sup> Therefore, we prospectively studied the oxygen saturation of blood samples simultaneously taken during both the supine and the sitting position from the superior vena cava (SVC), right atrium (RA), and PA.

## Materials and Methods

### Subjects

After obtaining approval from the Institutional Review Board at the University of Cologne (Cologne, Germany) and informed consent from each participant, we studied 70 patients scheduled to undergo a neurosurgical procedure in the sitting position.

### Anesthesia Protocol and Catheter Placement

Anesthesia was induced and maintained with intravenous fentanyl and midazolam. Monitoring included electrocardiography, intravascular blood pressure measurement, pulse oximetry, CV pressure monitoring, urine output monitoring, precordial Doppler ultrasound for detection of venous air embolism, and arterial blood gas analysis.

Multiorificed CV catheters (Vygon GmbH, Aachen, Germany) were inserted *via* the right subclavian vein,

\* Staff Anesthesiologist, Department of Anesthesiology, ‡ Staff Otorhinolaryngologist, Department of Otolaryngology, § Professor of Anesthesiology and Intensive Care Medicine, University of Cologne. † Vice-Head of Department of Anesthesiology, Erasmus MC, University Medical Centre, Rotterdam, The Netherlands.

Received from the Department of Anesthesiology, University of Cologne, Cologne, Germany. Submitted for publication November 23, 2004. Accepted for publication April 6, 2005. Support was provided solely from institutional and/or departmental sources.

Address reprint requests to Dr. Dueck: Department of Anesthesiology, University of Cologne, Joseph-Stelzmann-Str. 9, D-50924 Cologne, Germany. Address electronic mail to: m.dueck@uni-koeln.de. Individual article reprints may be purchased through the Journal Web site, www.anesthesiology.org.

and PA catheters (OptiQ<sup>®</sup>; Abbott, Chicago, IL) were inserted *via* the right internal jugular vein using a standard aseptic technique. Intravascular electrocardiography (Alphacard<sup>®</sup>; Sterimed, Puettlingen, Germany) was used to confirm the placement of the CV catheters in the lower SVC directly above the caval-atrial junction. The PA catheters were positioned following standard procedures. When the wedge position was obtained, the catheters were withdrawn to place the proximal injectate port in the RA, which was confirmed by intravascular electrocardiography.

#### *Blood Gas Analysis and Determination of Hemodynamic Variables*

Blood samples were drawn simultaneously from the PA, RA, and SVC at four different time points: (1) in the supine position after induction of anesthesia (T1); (2) twice during the neurosurgical operation in the sitting position (T2 and T3); and (3) in the supine position after the neurosurgical procedure was finished (T4). A standard volume of 1.5 ml blood was obtained from each site (QS 50<sup>®</sup>; Radiometer, Copenhagen, Denmark) and cooled in ice water after withdrawal of dead space blood and flushing fluid. Three consecutive oxygen saturations per blood sample were determined photospectrometrically immediately after each series of blood samples (OSM 3 Hemoximeter; Radiometer). The average of these three measurements was calculated for each site and each time point and used for further statistical analysis. Immediately after a series of blood samples was drawn, mean arterial blood pressure (MAP), heart rate, and cardiac output (CO) were recorded. CO was determined by bolus thermodilution technique using the PA catheter connected to a CO computer (Q-View<sup>®</sup>; Abbott). To quantify the repeatability of the standard oxygen saturation measurement method, in 17 patients, an additional five replicate blood samples were drawn immediately one after the other from the PA.

#### *Statistical Analysis*

Based on unpublished data from our institution in a similar neurosurgical population, a power analysis was performed before the study, and it indicated that a sample size of 70 patients was necessary ( $\alpha = 0.05$ , power = 0.80) to detect a difference of  $\pm 2\%$  between  $SvO_2$  and  $ScvO_2$ , which was defined as the smallest clinically relevant difference. The anticipated SD was set at  $\pm 5\%$ .

#### *Repeatability*

Each of the resulting five  $SvO_2$  values per patient were subtracted from each other, resulting in  $n = 17 \cdot 10$  individual differences. In accordance with the recommendations of Bland and Altman,<sup>27</sup> a one-way analysis of variance with subject as the factor was calculated for these 170 individual differences. The within-subject SD  $s_w$  was estimated as the square root of the residual mean

square. Furthermore, a 95% repeatability coefficient was calculated as  $1.96\sqrt{2s_w}$  ( $= 2.77s_w$ ), which is compared to the 95% limits of agreement between the different methods (see next section).

#### *Statistical Analysis of Individual Values*

The systematic error (bias) and the variability (SD of the bias) for  $SvO_2$  versus  $ScvO_2$  and  $SvO_2$  versus  $SraO_2$  were calculated. Bias was expressed as the mean of the differences of the individual values. The Student *t* test was used to determine whether the mean differences were significantly different from zero, and Pearson correlation coefficients between  $SvO_2$  and  $ScvO_2$  and between  $SvO_2$  and  $SraO_2$  were determined. Furthermore, 95% limits of agreement were calculated as bias  $\pm 1.96$  SD. The differences between individual values were plotted against their means for each time point (Bland and Altman plot).<sup>26</sup>

#### *Statistical Analysis of Changes in Oxygen Saturation*

For evaluating the agreement between the different sites of oxygen saturation measurement ( $SvO_2$  vs.  $ScvO_2$  and  $SvO_2$  vs.  $SraO_2$ ) regarding the trend of values, a Pearson correlation coefficient was calculated for differences of oxygen saturation between sequential time points (T1-T2, T2-T3, T3-T4).

To quantify changes in hemodynamic variables, corresponding to the oxygen saturation measurements, differences between sequential time points were calculated for MAP, heart rate, and CO. Values are presented as mean  $\pm$  SD unless otherwise stated. For all statistical procedures, a *P* value less than 0.05 was considered significant. The Statistical Package for the Social Sciences (SPSS, release 11.0; SPSS Inc., Chicago, IL) was used for all calculations.

## **Results**

Thirty-two male and 38 female patients with an average height of  $170.0 \pm 7.9$  cm (range, 147-190 cm), weight of  $76.1 \pm 9.0$  kg (40-120 kg), and age of  $53.1 \pm 8.8$  yr (17-78 yr) were enrolled in the study. Five patients had an American Society of Anesthesiologists (ASA) physical status of I, 38 had an ASA physical status of II, 24 had an ASA physical status of III, and 3 had an ASA physical status of IV. Mean changes of hemodynamic variables between time points were as follows: MAP,  $14.1 \pm 9.6\%$  (range, 2.4-42%); heart rate,  $16.1 \pm 16.0\%$  (0-69.2%); and CO,  $16.4 \pm 14.3\%$  (0-70%).

Evaluation of the agreement between different sites of oxygen saturation measurement requires knowledge about the repeatability of the oxygen saturation-measurement method itself.<sup>26</sup> Oxygen saturation values from 17  $\cdot$  5 replicate blood samples revealed a within-subject

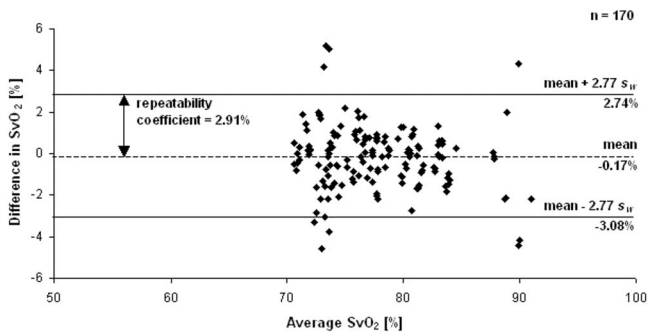

**Fig. 1.** Bland and Altman plot of the differences between replicate mixed venous oxygen saturation ( $SvO_2$ ) measurements against their mean values. Five replicate blood samples were drawn in 17 patients. Each of the resulting five  $SvO_2$  values per patient were subtracted from each other, resulting in  $n = 17 \cdot 10$  individual differences. The broken line indicates the mean difference, and unbroken lines indicate repeatability coefficient (mean  $\pm$  within-subject SD  $s_w$ ).

SD  $s_w$  of 1.05% and a repeatability coefficient of 2.91% (fig. 1).

Regarding the comparison of different sampling sites, ideally  $2 \cdot 280$  comparative pairs of measurements from 70 patients at four different time points could be made in our study. However, because of technical (incorrect position of catheter) or organizational reasons (duration of operation), 256 ( $SvO_2$  vs.  $ScvO_2$ ) and 246 ( $SvO_2$  vs.  $Srao_2$ ) comparative sets of measurements, respectively, were obtained (table 1). The mean  $SvO_2$  was larger than the mean  $ScvO_2$  and the mean  $Srao_2$  at all time points (T1–T4). Changing from the supine position to the sitting position (from T1 to T2) resulted in an increase in mean differences (bias) in oxygen saturation ( $SvO_2$  vs.  $ScvO_2$  and  $SvO_2$  vs.  $Srao_2$ ), whereas changing from the sitting position to the supine position (from T3 to T4) led to a decrease in bias ( $SvO_2$  vs.  $ScvO_2$  and  $SvO_2$  vs.  $Srao_2$ ) (table 1). Only once did the bias in oxygen saturations exceed 2% ( $SvO_2$  vs.  $ScvO_2$ ; bias at T3 = 2.79%), which was defined as a clinically relevant threshold (table 1). Correlation coefficients ranged from 0.688 ( $SvO_2$  vs.  $ScvO_2$ ; T4) to 0.851 ( $SvO_2$  vs.  $Srao_2$ ; T2) (table 1).

More important are the distributions of differences of individual values from various sites of measurement. Figure 2 depicts the Bland and Altman plot for  $SvO_2$  versus  $ScvO_2$ . Ninety-five percent limits of agreement for  $SvO_2$  versus  $Srao_2$  are calculated as  $\pm 7.12\%$  (T1),  $\pm 6.83\%$  (T2),  $\pm 7.32\%$  (T3), and  $\pm 6.58\%$  (T4). Differences in oxygen saturations of 10% or greater were observed in individual patients at all time points T1–T4 for comparisons  $SvO_2$  versus  $Srao_2$  and  $SvO_2$  versus  $ScvO_2$ .

Changes in oxygen saturation over time are presented in figure 3. Even when individual values were different, changes in  $ScvO_2$  and  $Srao_2$  paralleled changes in  $SvO_2$  quantitatively, demonstrated by correlation coefficients of  $R = 0.75$  ( $SvO_2$  vs.  $ScvO_2$ ) and  $R = 0.82$  ( $SvO_2$  vs.  $Srao_2$ ), respectively (table 2). Considering more distinct changes in  $SvO_2$  ( $> 5\%$  and  $> 10\%$ ), correlation coefficients increased (table 2). All values of  $R$  are highly significant ( $P < 0.0001$ ).

## Discussion

In the current study, the 95% limits of agreement between the standard  $SvO_2$  method and both the  $ScvO_2$  method and the  $Srao_2$  method were large. In fact, some individual measurements of oxygen saturation of CV blood and RA blood differed more than 10% from corresponding mixed venous blood values. Therefore, an enormous variability was found between absolute values of  $SvO_2$  and  $ScvO_2$  and of  $SvO_2$  and  $Srao_2$ , respectively, suggesting that individual values of  $ScvO_2$  and  $Srao_2$  cannot substitute true  $SvO_2$  values. However, the trend in  $ScvO_2$  values as well as the trend in  $Srao_2$  values demonstrated a good correlation with the trend in  $SvO_2$  values.

The relation between  $ScvO_2$  and  $SvO_2$  has been examined in numerous studies with controversial conclusions.<sup>6–25</sup> The wide range of conclusions might be the result of different study designs and of different statistical approaches (table 3). Some studies used animal models,<sup>12,14,17</sup> whereas other studies examined healthy volunteers<sup>21</sup> or patients with myocardial infarction.<sup>24</sup> The

**Table 1.** Mean Differences (Bias) and Correlation Coefficients in Oxygen Saturations of Blood Samples Taken from Various Sites

|                  | Difference in Oxygen Saturation at Various Time Points, % |                                   |                                   |                                   |
|------------------|-----------------------------------------------------------|-----------------------------------|-----------------------------------|-----------------------------------|
|                  | T1 (Supine Position)                                      | T2 (Sitting Position)             | T3 (Sitting Position)             | T4 (Supine Position)              |
| $SvO_2 - ScvO_2$ | $0.53 \pm 4.45$<br>(-10.3 to 14.8)                        | $1.26 \pm 4.65$<br>(-9.1 to 12.6) | $2.79 \pm 3.98$<br>(-6.1 to 10.4) | $1.69 \pm 4.16$<br>(-6.0 to 11.6) |
| n                | 64                                                        | 67                                | 66                                | 59                                |
| P                | 0.342                                                     | 0.03                              | < 0.0001                          | 0.003                             |
| r                | 0.762                                                     | 0.797                             | 0.758                             | 0.688                             |
| $SvO_2 - Srao_2$ | $0.38 \pm 3.56$<br>(-5.5 to 10.4)                         | $0.66 \pm 3.42$<br>(-7.7 to 10.0) | $1.44 \pm 3.66$<br>(-5.9 to 10.5) | $1.08 \pm 3.29$<br>(-5.2 to 10.6) |
| n                | 61                                                        | 65                                | 63                                | 57                                |
| P                | 0.4                                                       | 0.124                             | 0.003                             | 0.016                             |
| r                | 0.846                                                     | 0.851                             | 0.767                             | 0.772                             |

Values are presented as mean  $\pm$  SD (range).

n = number of comparative pairs of blood samples; P = P value (Student t test); r = Pearson correlation coefficient;  $ScvO_2$  = central venous oxygen saturation (%);  $Srao_2$  = right atrium oxygen saturation (%);  $SvO_2$  = mixed venous oxygen saturation (%).

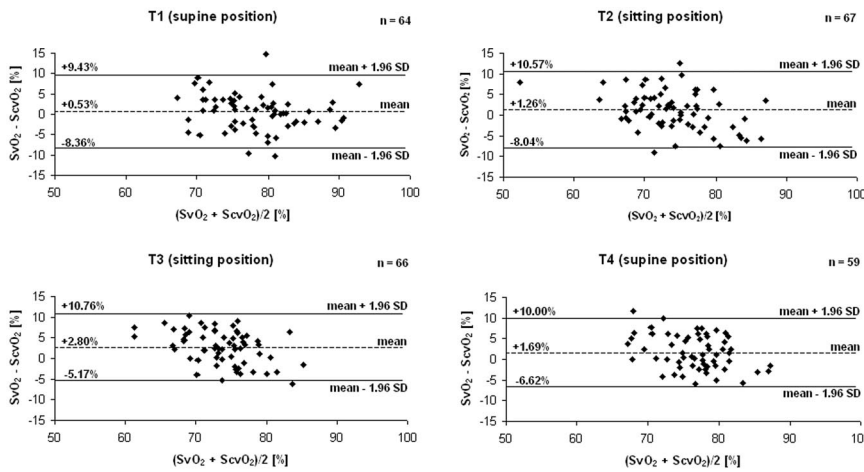

**Fig. 2.** Bland and Altman plots of the differences between mixed venous oxygen saturation ( $SvO_2$ ) and central venous oxygen saturation ( $ScvO_2$ ) at different time points. (*T1*) Supine position after induction of anesthesia and insertion of catheters. (*T2* and *T3*) During the neurosurgical procedure in the sitting position, with an interval of at least 1 h between. (*T4*) Supine position after the neurosurgical procedure was completed. The *broken line* indicates the mean difference (bias), and *unbroken lines* indicate 95% limits of agreement (mean  $\pm$  SD). Note the large 95% limits of agreement.

number of subjects ranged from 7<sup>9</sup> to 61,<sup>7</sup> and the number of comparative pairs of measurements ranged from 27<sup>6</sup> to 580.<sup>9</sup> In most studies, an unequal number of blood samples per subject was drawn,<sup>8-14,16,21,25</sup> potentially resulting in an imbalanced statistical weight of subjects with exceedingly good or bad correspondences of  $ScvO_2$  and  $SvO_2$ . In addition, in some studies, blood samples were not drawn simultaneously, but sequentially during the advancement of the PA catheter,<sup>6-8,16,21</sup> possibly causing arrhythmia<sup>31</sup> and thus significantly altering hemodynamic variables, which may result in different oxygen saturations at different sites of measurement.

Neither a power analysis nor an analysis of method repeatability was presented in previous investigations. A power analysis has to be calculated on the basis of a difference between  $SvO_2$  and  $ScvO_2$  that is defined as clinically relevant before the study. Furthermore, this  $\Delta (SvO_2 - ScvO_2)$  value serves as an *a priori* standard,

which is necessary to discuss the variability found in the actual study data. Evaluation of the repeatability of single measurements is a very important issue because the repeatability of methods limits the amount of agreement that is possible.<sup>27</sup> Therefore, repeatability represents a baseline (within-method variability) to which the between-method variability can be compared.

Most studies present the bias<sup>6-8,10,11,13,15-20</sup> as well as correlation coefficients between the measurements.<sup>7-20,25</sup> However, calculating bias and correlation coefficients for individual values is not enough for evaluating the agreement of two different methods.<sup>26,27</sup> Despite large differences between individual values, the bias (*i.e.*, mean of the differences between individual values) might be zero, and the correlation coefficient measures proportionality, not agreement. In 1986, Bland and Altman<sup>26</sup> recommended the calculation of 95% limits of agreement of individual values for method comparison studies. However, only 5 of 10 investigations studying the equivalence of  $SvO_2$  and  $ScvO_2$  have presented these limits of agreement since then.<sup>9-11,14,18</sup> Furthermore, only 8 of 17 studies analyzed the agreement of the trend of oxygen saturations measured at different sites in addition to the agreement of absolute values.<sup>8-13,15,17</sup>

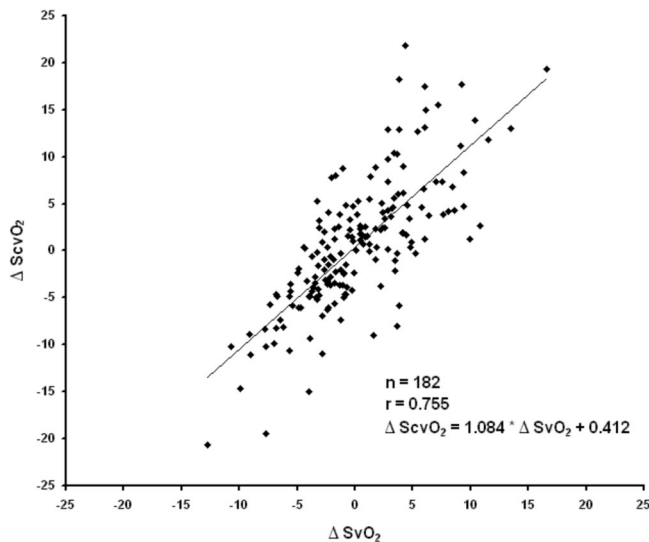

**Fig. 3.** Changes in mixed venous ( $\Delta SvO_2$ ) and central venous oxygen saturation ( $\Delta ScvO_2$ ) between two measurements.  $n = 182$ ;  $r = 0.755$ ; equation of the regression line:  $\Delta ScvO_2 = 1.084 \times \Delta SvO_2 + 0.412$ .

**Table 2.** Correlation of Changes in Oxygen Saturation of Blood Samples Taken from Different Sites

| Site        | Changes in Oxygen Saturation between Different Time Points |       |          |
|-------------|------------------------------------------------------------|-------|----------|
|             | n                                                          | R     | P        |
| PA vs. SVC  |                                                            |       |          |
| Diff  > 0%  | 182                                                        | 0.755 | < 0.0001 |
| Diff  > 5%  | 71                                                         | 0.849 | < 0.0001 |
| Diff  > 10% | 23                                                         | 0.930 | < 0.0001 |
| PA vs. RA   |                                                            |       |          |
| Diff  > 0%  | 176                                                        | 0.821 | < 0.0001 |
| Diff  > 5%  | 70                                                         | 0.916 | < 0.0001 |
| Diff  > 10% | 24                                                         | 0.928 | < 0.0001 |

|Diff| = absolute value of the change in oxygen saturation between sequential time points; n = number of analyzed differences in oxygen saturation between different time points; P = P value; PA = pulmonary artery; R = Pearson correlation coefficient; RA = right atrium; SVC = superior vena cava.

**Table 3. Studies Comparing Mixed Venous Oxygen Saturation and Central Venous Oxygen Saturation**

| Author                                         | Subjects                                                           | No. of Pairs of Comparative Measurements (SvO <sub>2</sub> - SraO <sub>2</sub> ) | Equal No. of Samples per Subject | Power Analysis | Blood Samples Drawn Simultaneously        | Repeatability of Measurements |
|------------------------------------------------|--------------------------------------------------------------------|----------------------------------------------------------------------------------|----------------------------------|----------------|-------------------------------------------|-------------------------------|
| <b>Animal studies</b>                          |                                                                    |                                                                                  |                                  |                |                                           |                               |
| Davies <i>et al.</i> , <sup>17</sup> 1988      | 10 pigs, circulatory shock or lung damage                          | 464, only SraO <sub>2</sub> vs. SvO <sub>2</sub>                                 | No                               | No             | Yes, fiberoptic sensors                   | No                            |
| Reinhart <i>et al.</i> , <sup>12</sup> 1989    | 38 dogs, hypoxia, hemorrhage, or resuscitation                     | 179                                                                              | No                               | No             | Yes                                       | No                            |
| Schou <i>et al.</i> , <sup>14</sup> 1998       | 20 pigs, hemodilution                                              | 92                                                                               | No                               | No             | Yes                                       | No                            |
| <b>Clinical studies</b>                        |                                                                    |                                                                                  |                                  |                |                                           |                               |
| Barratt-Boyes and Wood, <sup>21</sup> 1957     | 26 healthy subjects                                                | 49?*                                                                             | No                               | No             | No, consecutive samples                   | No                            |
| Scheinman <i>et al.</i> , <sup>13</sup> 1969   | 24 critically ill patients                                         | 52                                                                               | No                               | No             | Yes                                       | No                            |
| Lee <i>et al.</i> , <sup>8</sup> 1972          | 44 critically ill patients                                         | 54                                                                               | No                               | No             | No, consecutive samples                   | No                            |
| Tahvanainen <i>et al.</i> , <sup>15</sup> 1982 | 42 critically ill patients                                         | 44                                                                               | No                               | No             | Yes                                       | No                            |
| Wendt <i>et al.</i> , <sup>25</sup> 1990       | 19 critically ill patients                                         | 44                                                                               | No                               | No             | Yes                                       | No                            |
| Berridge, <sup>20</sup> 1992                   | 51 patients, ICU and cardiovascular surgery                        | 76                                                                               | No                               | No             | No comment                                | No                            |
| Martin <i>et al.</i> , <sup>9</sup> 1992       | 7 critically ill patients                                          | 580                                                                              | No                               | No             | Yes, fiberoptic sensors                   | No                            |
| Herrera <i>et al.</i> , <sup>19</sup> 1993     | 23 patients, single-lung ventilation                               | 283, seven measurement time points                                               | Yes                              | No             | Yes, blood samples and fiberoptic sensors | No                            |
| Pieri <i>et al.</i> , <sup>10</sup> 1995       | 39 critically ill patients after major surgery                     | 296, only SraO <sub>2</sub> vs. SvO <sub>2</sub>                                 | No                               | No             | Yes                                       | No                            |
| Edwards and Mavall, <sup>6</sup> 1998          | 30 critically ill patients                                         | 27                                                                               | Yes                              | No             | No, consecutive samples                   | No                            |
| Turnaoglu <i>et al.</i> , <sup>16</sup> 2001   | 41 critically ill patients, 32 patients for cardiovascular surgery | 73                                                                               | Yes                              | No             | No, consecutive samples                   | No                            |
| Ladakis <i>et al.</i> , <sup>7</sup> 2001      | 61 critically ill patients                                         | 61                                                                               | Yes                              | No             | No, consecutive fiberoptic measurements   | No                            |
| Reinhart <i>et al.</i> , <sup>11</sup> 2004    | 29 critically ill patients                                         | 150†                                                                             | No                               | No             | No comment                                | No‡                           |
| Chawla <i>et al.</i> , <sup>18</sup> 2004      | 32 postoperative patients, 21 critically ill patients              | 53, only SraO <sub>2</sub> vs. SvO <sub>2</sub>                                  | Yes                              | No             | Rapid succession                          | No                            |
| Current study                                  | 70 neurosurgical patients                                          | 256, four measurement time points                                                | Yes                              | Yes            | Yes                                       | Yes                           |

(Table continues)

Table 3. Continued

| Author                                         | Mean of Individual Differences (ScvO <sub>2</sub> - SvO <sub>2</sub> ) (Bias) | Correlation Coefficient of ScvO <sub>2</sub> and SvO <sub>2</sub> | 95% Limits of Agreement | Change of Oxygen Saturation over Time (Trend) | Authors' Conclusion                                                                                                                                                     |
|------------------------------------------------|-------------------------------------------------------------------------------|-------------------------------------------------------------------|-------------------------|-----------------------------------------------|-------------------------------------------------------------------------------------------------------------------------------------------------------------------------|
| <b>Animal studies</b>                          |                                                                               |                                                                   |                         |                                               |                                                                                                                                                                         |
| Davies <i>et al.</i> , <sup>17</sup> 1988      | Yes                                                                           | Yes                                                               | No                      | Yes                                           | Animal model, fiberoptic measurement: SraO <sub>2</sub> = SvO <sub>2</sub>                                                                                              |
| Reinhart <i>et al.</i> , <sup>12</sup> 1989    | No                                                                            | Yes                                                               | No                      | Yes                                           | Animal model: Individual ScvO <sub>2</sub> values are not sufficiently identical to SvO <sub>2</sub><br>Trend: Close tracking of ScvO <sub>2</sub> and SvO <sub>2</sub> |
| Schou <i>et al.</i> , <sup>14</sup> 1998       | No                                                                            | Yes                                                               | Yes                     | No                                            | Animal model: During hemodilution, monitoring of ScvO <sub>2</sub> is as useful as monitoring of SvO <sub>2</sub>                                                       |
| <b>Clinical studies</b>                        |                                                                               |                                                                   |                         |                                               |                                                                                                                                                                         |
| Barratt-Boyes and Wood, <sup>21</sup> 1957     | No                                                                            | No                                                                | (Yes)§                  | No                                            | Only mean values are presented; ScvO <sub>2</sub> - SvO <sub>2</sub> is not calculated for individual pairs of measurements                                             |
| Scheinman <i>et al.</i> , <sup>13</sup> 1969   | Yes                                                                           | Yes                                                               | No                      | Yes                                           | Patients in heart failure or shock:<br>Individual values: ScvO <sub>2</sub> = / SvO <sub>2</sub><br>Trend: ScvO <sub>2</sub> = SvO <sub>2</sub>                         |
| Lee <i>et al.</i> , <sup>8</sup> 1972          | Yes                                                                           | Yes                                                               | No                      | Yes                                           | Patients in shock:<br>Individual values: ScvO <sub>2</sub> < SvO <sub>2</sub><br>Trend: SvO <sub>2</sub> must be interpreted cautiously                                 |
| Tahvanainen <i>et al.</i> , <sup>15</sup> 1982 | Yes                                                                           | Yes                                                               | No                      | Yes                                           | Individual values: ScvO <sub>2</sub> = SvO <sub>2</sub> for clinical use but not for exact values                                                                       |
| Wendt <i>et al.</i> , <sup>25</sup> 1990       | No                                                                            | Yes                                                               | No                      | No                                            | Trend: ScvO <sub>2</sub> = SvO <sub>2</sub><br>Individual values: ScvO <sub>2</sub> yields adequate information on SvO <sub>2</sub>                                     |
| Berridge <sup>20</sup> 1992                    | Yes                                                                           | Yes                                                               | No                      | No                                            | Individual values: ScvO <sub>2</sub> is a useful estimate of SvO <sub>2</sub>                                                                                           |
| Martin <i>et al.</i> , <sup>9</sup> 1992       | No                                                                            | Yes                                                               | Yes                     | Yes                                           | Monitoring of ScvO <sub>2</sub> and SvO <sub>2</sub> is not interchangeable                                                                                             |
| Herrera <i>et al.</i> , <sup>19</sup> 1993     | Yes                                                                           | Yes                                                               | No#                     | No                                            | Thoracic anesthesia: SvO <sub>2</sub> may be substituted by ScvO <sub>2</sub>                                                                                           |
| Pieri <i>et al.</i> , <sup>10</sup> 1995       | Yes                                                                           | Yes                                                               | Yes                     | Yes                                           | Individual values: ScvO <sub>2</sub> = / SvO <sub>2</sub><br>Trend: ScvO <sub>2</sub> = / SvO <sub>2</sub>                                                              |
| Edwards and Mavall, <sup>6</sup> 1998          | Yes                                                                           | No                                                                | No**                    | No                                            | Patients in shock: ScvO <sub>2</sub> = / SvO <sub>2</sub>                                                                                                               |
| Turnaoglu <i>et al.</i> , <sup>16</sup> 2001   | Yes                                                                           | Yes                                                               | No                      | No                                            | SvO <sub>2</sub> should not be replaced by ScvO <sub>2</sub>                                                                                                            |

(Table continues)

Table 3. Continued

| Author                                      | Mean of Individual Differences (Scvo <sub>2</sub> - Svo <sub>2</sub> ) (Bias) | Correlation Coefficient of Scvo <sub>2</sub> and Svo <sub>2</sub> | 95% Limits of Agreement | Change of Oxygen Saturation over Time (Trend) | Authors' Conclusion                                                                                                                                                                 |
|---------------------------------------------|-------------------------------------------------------------------------------|-------------------------------------------------------------------|-------------------------|-----------------------------------------------|-------------------------------------------------------------------------------------------------------------------------------------------------------------------------------------|
| Ladakis <i>et al.</i> , <sup>7</sup> 2001   | Yes                                                                           | Yes                                                               | No                      | No                                            | Individual Svo <sub>2</sub> and Scvo <sub>2</sub> values are interchangeable                                                                                                        |
| Reinhart <i>et al.</i> , <sup>11</sup> 2004 | Yes                                                                           | Yes                                                               | Yes                     | Yes                                           | Individual values: Svo <sub>2</sub> = / Scvo <sub>2</sub><br>Trend: Scvo <sub>2</sub> has potential to guide therapy                                                                |
| Chawla <i>et al.</i> , <sup>18</sup> 2004   | Yes                                                                           | Yes                                                               | Yes                     | No                                            | Individual values: Svo <sub>2</sub> = / Scvo <sub>2</sub><br>The difference between Svo <sub>2</sub> and Scvo <sub>2</sub> may be a marker of myocardial O <sub>2</sub> consumption |
| Current study                               | Yes                                                                           | Yes                                                               | Yes                     | Yes                                           | Neurosurgical patients: Individual values: Scvo <sub>2</sub> = / Svo <sub>2</sub><br>Trend: Scvo <sub>2</sub> = Svo <sub>2</sub> for clinical decisions                             |

\* The authors calculate mean central venous oxygen saturation (Scvo<sub>2</sub>) and mixed venous oxygen saturation (Svo<sub>2</sub>) values from 49 (superior vena cava) and 59 samples (pulmonary artery), respectively. However, no differences of comparative measurements are presented. † The authors also report on agreement between (1) *in vivo* (fiberoptic sensors) and *in vitro* Scvo<sub>2</sub> measurements (150 pairs of comparative measurements) and on agreement between (2) continuous *in vivo* measurements (fiberoptic sensors) of Svo<sub>2</sub> and Scvo<sub>2</sub> (395,128 pairs of comparative measurements). ‡ The authors evaluated the effect of different variables (hemoglobin, pH, hematocrit, temperature) on the accuracy of the continuous *in vivo* measurement (fiberoptic sensors) of Scvo<sub>2</sub>. § In this study from 1957, the authors discuss their data using the mean as well as twice the SD of the differences of comparative measurements. These variables are introduced by Bland and Altman to define their concept of the 95% limits of agreement almost 20 years later. || The 95% limits of agreement are discussed in the Discussion section but not depicted in the Bland and Altman plots. # The authors present SD of the mean difference between individual values (bias). \*\* The authors present confidence limits instead of 95% limits of agreement.

The wide range of 95% limits of agreement regarding individual values of Svo<sub>2</sub> and Scvo<sub>2</sub> found in our study indicates a large between-method variability. Because the 95% repeatability coefficient was 2.91% in our study, this considerable lack of agreement between the methods is not solely explained by a lack of repeatability. Our finding parallels the results of previous studies, demonstrating an enormous variability of absolute values.<sup>6,8-13,16,18</sup> In contrast, some studies found that individual Scvo<sub>2</sub> values can adequately replace Svo<sub>2</sub> values,<sup>7,15,17,20,24,25</sup> but these studies do not present a statistical analysis that includes more than the evaluation of bias and correlation coefficients. In addition, none of these studies performed a power analysis before the investigation. Therefore, it remains unclear whether a number of 44<sup>15,25</sup> or 76<sup>20</sup> comparative measurements is enough to detect statistically significant differences. Schou *et al.*<sup>14</sup> concluded from their data that Svo<sub>2</sub> and Scvo<sub>2</sub> are interchangeable, although the 95% limits of agreement plotted in their figures equaled or exceeded  $\pm 10\%$ . Because of these controversial results regarding absolute values, there has been a considerable debate on the question of the clinical utility of Scvo<sub>2</sub>.<sup>1,32</sup>

Clinical decisions are rarely based on single measurements but always reflect various variables as well as the trend of these variables. In the early stage of a disease, Scvo<sub>2</sub> values are often found to be less than 50%, with Svo<sub>2</sub> values even lower.<sup>1</sup> Consequently, these low Scvo<sub>2</sub>

values, although they do not exactly equal Svo<sub>2</sub> values, may serve as a representative variable guiding therapeutic interventions. Furthermore, not the individual value but the trend of Scvo<sub>2</sub> may detect an imbalance of oxygen delivery and oxygen consumption. Our study reveals a good correlation between the trends of Svo<sub>2</sub> and Scvo<sub>2</sub>, which is in accordance with previous studies.<sup>11-13,15</sup> Scheinman *et al.*<sup>13</sup> found a poor correlation between absolute values in patients with severe heart failure or shock but a better correlation between changes of Svo<sub>2</sub> and Scvo<sub>2</sub>. In an animal model, Reinhart *et al.*<sup>12</sup> demonstrated a close tracking of the oxygen saturations continuously measured in the PA and the SVC across a wide range of hemodynamic conditions. In a recent study, the same group could confirm these findings in critically ill patients.<sup>11</sup> Tahvanainen *et al.*<sup>15</sup> found a significant correlation between PA blood samples and both SVC and RA blood samples during subsequent changes of oxygen saturation in critically ill patients. These data suggest that Scvo<sub>2</sub> is equivalent to Svo<sub>2</sub> in the course of clinical decisions as long as absolute values are not required. This is supported by our data, because the degree of correlation between the trend of Scvo<sub>2</sub> and Svo<sub>2</sub> is better with larger changes in oxygen saturation. In a recent study, Rivers *et al.*<sup>33</sup> significantly reduced mortality and organ dysfunction in patients with severe sepsis or septic shock using an early goal-directed

therapy approach. The early goal-directed algorithm of the treatment of the first 6 h included the continuous measurement of  $ScvO_2$  defining an  $ScvO_2$  value greater than 70% as an endpoint of therapy.<sup>33</sup> Although some variables of the algorithm, including  $ScvO_2$ , have been criticized,<sup>34</sup> monitoring  $ScvO_2$  has recently been declared as appropriate for the management of severe sepsis.<sup>5</sup>

In addition, in our study, a comparison between  $SvO_2$  and  $SraO_2$  could be performed using the proximal port of the PA catheter for withdrawal of blood samples from the RA. However, 95% limits of agreement were too large to accept individual  $SraO_2$  values as equivalent to  $SvO_2$ . The trend of  $SraO_2$  correlated better with  $SvO_2$  than those of  $ScvO_2$ . However, because of potential dangerous complications (e.g., arrhythmia, perforation), placing the catheter tip in the RA is not recommended<sup>35</sup> or at least debatable.<sup>36</sup>

### Limitations of the Study

Monitoring  $SvO_2$  is used as a clinical marker of systemic oxygen utilization in critically ill patients.<sup>1</sup> During sepsis, a redistribution of blood flow associated with a proportionally greater reduction in splenic, renal, and mesenteric blood flow may occur,<sup>1,32</sup> and in heart failure or circulatory shock, blood flow is relatively increased in cerebral and coronary circulation,<sup>8,13</sup> thus altering the relation between  $SvO_2$  and  $ScvO_2$ , with  $SvO_2$  generally lower than  $ScvO_2$ . However, our study was performed in patients scheduled to undergo elective neurosurgical operations in the sitting position during general anesthesia, resulting in a mean  $SvO_2$  higher than  $ScvO_2$ . This study design was chosen because, in our neuroanesthesia department, these patients are routinely monitored with both a PA catheter and a CV catheter (for aspiration of entrained air), whereas critically ill patients are rarely provided with both catheters. Second, this setting, in contrast to the clinical situation of critically ill patients, allows withdrawal of blood samples at different time points that are clearly defined. Third, positioning the patient from the supine position to the sitting position and *vice versa* was reported to induce a clear change of hemodynamic variables<sup>28,29</sup> due to a change in blood volume distribution from the intrathoracic to the extrathoracic compartment,<sup>30</sup> which is demonstrated for the current study. A mean change of 14% in MAP, with  $\Delta$ MAP greater than 40% in some patients, and a mean difference in CO of 16%, with a maximum  $\Delta$ CO of 70%, were detected. This might partly mimic the situation of patients in hypovolemic shock and resulted in an increase in bias between  $SvO_2$  and  $ScvO_2$  after changing the position from supine to sitting and *vice versa* in a decrease in bias after changing the position from sitting to supine. Anesthesia was induced and maintained with intravenous fentanyl and midazolam in all patients. Because both drugs are often used as a sedative or an

analgesic on the intensive care unit,<sup>37,38</sup> the anesthesia regimen used in our study is not significantly different from sedation regimens used in critically ill patients. Furthermore, fentanyl and midazolam are reported to produce only modest hemodynamic effects.<sup>39,40</sup> Therefore, it is unlikely that our findings are significantly affected by the specific anesthesia regimen.

In summary, our study demonstrates that despite some large differences between absolute values, in patients with varying hemodynamic situations, the trend in  $ScvO_2$  may be used as a surrogate variable for the trend in  $SvO_2$ .

The authors thank Gernot Wassmer, Ph.D. (Assistant Professor, Institute of Medical Statistics and Epidemiology, University of Cologne, Cologne, Germany), for statistical advice.

### References

1. Rivers EP, Ander DS, Powell D: Central venous oxygen saturation monitoring in the critically ill patient. *Curr Opin Crit Care* 2001; 7:204-11
2. Connors Jr, AF Speroff, T, Dawson NV, Thomas C, Harrell Jr, FE Wagner, D, Desbiens N, Goldman L, Wu AW, Califf RM, Fulkerson Jr, WJ Vidaillet, H, Broste S, Bellamy P, Lynn J, Knaus WA: The effectiveness of right heart catheterization in the initial care of critically ill patients. SUPPORT Investigators. *JAMA* 1996; 276:889-97
3. Peters SG, Afessa B, Decker PA, Schroeder DR, Offord KP, Scott JP: Increased risk associated with pulmonary artery catheterization in the medical intensive care unit. *J Crit Care* 2003; 18:166-71
4. Soni N: Swan song for the Swan-Ganz catheter? *BMJ* 1996; 313:763-4
5. Dellinger RP, Carlet JM, Masur H, Gerlach H, Calandra T, Cohen J, Gea-Banacloche J, Keh D, Marshall JC, Parker MM, Ramsay G, Zimmerman JL, Vincent JL, Levy MM: Surviving Sepsis Campaign guidelines for management of severe sepsis and septic shock. *Crit Care Med* 2004; 32:858-73
6. Edwards JD, Mayall RM: Importance of the sampling site for measurement of mixed venous oxygen saturation in shock. *Crit Care Med* 1998; 26:1356-60
7. Ladakis C, Myrianthefs P, Karabinis A, Karatzas G, Dostos T, Fildissis G, Gogas J, Baltopoulos G: Central venous and mixed venous oxygen saturation in critically ill patients. *Respiration* 2001; 68:279-85
8. Lee J, Wright F, Barber R, Stanley L: Central venous oxygen saturation in shock: A study in man. *ANESTHESIOLOGY* 1972; 36:472-8
9. Martin C, Auffray JP, Badetti C, Perrin G, Papazian L, Gouin F: Monitoring of central venous oxygen saturation versus mixed venous oxygen saturation in critically ill patients. *Intensive Care Med* 1992; 18:101-4
10. Pieri M, Brandi LS, Bertolini R, Calafa M, Giunta F: Comparison of bench central and mixed pulmonary venous oxygen saturation in critically ill postoperative patients [in Italian]. *Minerva Anestesiol* 1995; 61:285-91
11. Reinhart K, Kuhn HJ, Hartog C, Bredle DL: Continuous central venous and pulmonary artery oxygen saturation monitoring in the critically ill. *Intensive Care Med* 2004; 30:1572-8
12. Reinhart K, Rudolph T, Bredle DL, Hannemann L, Cain SM: Comparison of central-venous to mixed-venous oxygen saturation during changes in oxygen supply/demand. *Chest* 1989; 95:1216-21
13. Scheinman MM, Brown MA, Rapaport E: Critical assessment of use of central venous oxygen saturation as a mirror of mixed venous oxygen in severely ill cardiac patients. *Circulation* 1969; 40:165-72
14. Schou H, Perez de Sa V, Larsson A: Central and mixed venous blood oxygen correlate well during acute normovolemic hemodilution in anesthetized pigs. *Acta Anaesthesiol Scand* 1998; 42:172-7
15. Tahvanainen J, Meretoja O, Nikki P: Can central venous blood replace mixed venous blood samples? *Crit Care Med* 1982; 10:758-61
16. Turnaoglu S, Tugrul M, Camci E, Cakar N, Akinci O, Ergin P: Clinical applicability of the substitution of mixed venous oxygen saturation with central venous oxygen saturation. *J Cardiothorac Vasc Anesth* 2001; 15:574-9
17. Davies GG, Mendenhall J, Symreng T: Measurement of right atrial oxygen saturation by fiberoptic oximetry accurately reflects mixed venous oxygen saturation in swine. *J Clin Monit* 1988; 4:99-102
18. Chawla LS, Zia H, Gutierrez G, Katz NM, Seneff MG, Shah M: Lack of equivalence between central and mixed venous oxygen saturation. *Chest* 2004; 126:1891-6
19. Herrera A, Pajuelo A, Morano MJ, Ureta MP, Gutierrez-Garcia J, de las Mulas M: Comparison of oxygen saturations in mixed venous and central blood during thoracic anesthesia with selective single-lung ventilation [in Spanish]. *Rev Esp Anestesiol Reanim* 1993; 40:349-53
20. Berridge JC: Influence of cardiac output on the correlation between mixed venous and central venous oxygen saturation. *Br J Anaesth* 1992; 69:409-10



21. Barrat-Boyes BG, Wood EH: The oxygen saturation of blood in the venae cavae, right-heart chambers, and pulmonary vessels of healthy subjects. *J Lab Clin Med* 1957; 50:93-106
22. Baquero Cano M, Sanchez Luna M, Elorza Fernandez MD, Valcarcel Lopez M, Perez Rodriguez J, Quero Jimenez J: Oxygen transport and consumption and oxygen saturation in the right atrium in an experimental model of neonatal septic shock [in Spanish]. *An Esp Pediatr* 1996; 44:149-56
23. Faber T: Central venous versus mixed venous oxygen content. *Acta Anaesthesiol Scand Suppl* 1995; 107:33-6
24. Goldman RH, Klughaupt M, Metcalf T, Spivack AP, Harrison DC: Measurement of central venous oxygen saturation in patients with myocardial infarction. *Circulation* 1968; 38:941-6
25. Wendt M, Hachenberg T, Albert A, Janzen R: Mixed venous versus central venous oxygen saturation in intensive medicine [in German]. *Anasth Intensivther Notfallmed* 1990; 25:102-6
26. Bland JM, Altman DG: Statistical methods for assessing agreement between two methods of clinical measurement. *Lancet* 1986; 1:307-10
27. Bland JM, Altman DG: Measuring agreement in method comparison studies. *Stat Methods Med Res* 1999; 8:135-60
28. Dalrymple DG, MacGowan GF, MacLeod SW: Cardiorespiratory effects of the sitting position in neurosurgery. *Br J Anaesth* 1979; 51:1079-82
29. Porter JM, Pidgeon C, Cunningham AJ: The sitting position in neurosurgery: A critical appraisal. *Br J Anaesth* 1999; 82:117-28
30. Buhre W, Weyland A, Buhre K, Kazmaier S, Mursch K, Schmidt M, Sydow M, Sonntag H: Effects of the sitting position on the distribution of blood volume in patients undergoing neurosurgical procedures. *Br J Anaesth* 2000; 84:354-7
31. Keusch DJ, Winters S, Thys DM: The patient's position influences the incidence of dysrhythmias during pulmonary artery catheterization. *ANESTHESIOLOGY* 1989; 70:582-4
32. Vincent JL: Does central venous oxygen saturation accurately reflect mixed venous oxygen saturation? Nothing is simple, unfortunately. *Intensive Care Med* 1992; 18:386-7
33. Rivers E, Nguyen B, Havstad S, Ressler J, Muzzin A, Knoblich B, Peterson E, Tomlanovich M: Early goal-directed therapy in the treatment of severe sepsis and septic shock. *N Engl J Med* 2001; 345:1368-77
34. Marik PE, Varon J: Goal-directed therapy for severe sepsis. *N Engl J Med* 2002; 346:1025-6
35. McGee WT, Ackerman BL, Rouben LR, Prasad VM, Bandi V, Mallory DL: Accurate placement of central venous catheters: A prospective, randomized, multicenter trial. *Crit Care Med* 1993; 21:1118-23
36. Vesely TM: Central venous catheter tip position: A continuing controversy. *J Vasc Interv Radiol* 2003; 14:527-34
37. Prause A, Wappler F, Scholz J, Bause H, Schulte am Esch J: Respiratory depression under long-term sedation with sufentanil, midazolam and clonidine has no clinical significance. *Intensive Care Med* 2000; 26:1454-61
38. Soliman HM, Melot C, Vincent JL: Sedative and analgesic practice in the intensive care unit: the results of a European survey. *Br J Anaesth* 2001; 87:186-92
39. Reves JG, Glass PA: Nonbarbiturate intravenous anesthetics, *Anesthesia*, 5th edition. Edited by Miller RD. Philadelphia, Churchill Livingstone, 2000, pp. 228-72
40. Bailey PL, Talmage DE, Stanley TH: Intravenous opioid anesthetics, *Anesthesia*, 5th edition. Edited by Miller RD. Philadelphia, Churchill Livingstone, 2000, pp. 273-376
